# Supplementary material
Source: PubMed Central journal article supplement (PMC9107292)
Supplement: NIHMS1790060-supplement-Appendix_A.pdf [file NIHMS1790060-supplement-Appendix_A.pdf]

## Figure 1. Thematic Analysis of Mapping the Domains of Perinatal Mental Health

| People                                                                                                                                                                                                                                      | Systems                                                                                                                                                                                                                                | Structures                                                                                                                                                                                                                                                   |
|---------------------------------------------------------------------------------------------------------------------------------------------------------------------------------------------------------------------------------------------|----------------------------------------------------------------------------------------------------------------------------------------------------------------------------------------------------------------------------------------|--------------------------------------------------------------------------------------------------------------------------------------------------------------------------------------------------------------------------------------------------------------|
| <ul style="list-style-type: none"><li>• Development of Self Advocacy Strategies</li><li>• Knowledge Acquisition</li><li>• Clinical Training</li><li>• Risks of Being Vulnerable with Clinicians</li><li>• Community-Based Healing</li></ul> | <ul style="list-style-type: none"><li>• Oppressive or Helpful</li><li>• Lack of Congruence or Access to Services</li><li>• Disenfranchised Experiences and Grief</li><li>• Culture and Systems Change – Thriving Communities</li></ul> | <ul style="list-style-type: none"><li>• Unhelpful or Harmful Healthcare Structures</li><li>• Racism</li><li>• Language: PsychoSocialSpiritual</li><li>• Medical Model Adaptation</li><li>• Mental Health Stigma</li><li>• Intergenerational Trauma</li></ul> |
